# Supplementary material
Source: publisher site journal article supplement (https://www.spandidos-publications.com/6707/downloadSupplementary)
Supplement: Supplementary file 1 [file downloadSupplementary]

## Sheet: Table S2
Table SII. KEGG enrichment of differentially expressed ferroptosis-related genes in RNA-seq data.
#Term	Database	ID	Input number	Background number	P-Value	Corrected P-Value	Input	Hyperlink
NOD-like receptor signaling pathway	KEGG PATHWAY	mmu04621	5	206	4.41e-07	4.01e-05	CYBB|IL6|CXCL2|TNFAIP3|TXNIP	http://www.genome.jp/kegg-bin/show_pathway?mmu04621/mmu:13058%09red/mmu:20310%09red/mmu:21929%09red/mmu:16193%09red/mmu:56338%09red
HIF-1 signaling pathway	KEGG PATHWAY	mmu04066	4	114	1.69e-06	7.7e-05	CYBB|IL6|HMOX1|HIF1A	http://www.genome.jp/kegg-bin/show_pathway?mmu04066/mmu:16193%09red/mmu:13058%09red/mmu:15251%09red/mmu:15368%09red
Fluid shear stress and atherosclerosis	KEGG PATHWAY	mmu05418	4	143	4.06e-06	0.000105092	NCF2|DUSP1|HMOX1|CAV1	http://www.genome.jp/kegg-bin/show_pathway?mmu05418/mmu:17970%09red/mmu:19252%09red/mmu:12389%09red/mmu:15368%09red
Ferroptosis	KEGG PATHWAY	mmu04216	3	41	4.62e-06	0.000105092	CYBB|HMOX1|SLC7A11	http://www.genome.jp/kegg-bin/show_pathway?mmu04216/mmu:13058%09red/mmu:26570%09red/mmu:15368%09red
Central carbon metabolism in cancer	KEGG PATHWAY	mmu05230	3	67	1.89e-05	0.000343073	G6PDX|SLC7A5|HIF1A	http://www.genome.jp/kegg-bin/show_pathway?mmu05230/mmu:20539%09red/mmu:15251%09red/mmu:14381%09red
IL-17 signaling pathway	KEGG PATHWAY	mmu04657	3	91	4.56e-05	0.000691862	IL6|CXCL2|TNFAIP3	http://www.genome.jp/kegg-bin/show_pathway?mmu04657/mmu:20310%09red/mmu:21929%09red/mmu:16193%09red
TNF signaling pathway	KEGG PATHWAY	mmu04668	3	113	8.53e-05	0.00110926	IL6|CXCL2|TNFAIP3	http://www.genome.jp/kegg-bin/show_pathway?mmu04668/mmu:20310%09red/mmu:21929%09red/mmu:16193%09red
Proteoglycans in cancer	KEGG PATHWAY	mmu05205	3	206	0.000482345	0.00547222	CD44|HIF1A|CAV1	http://www.genome.jp/kegg-bin/show_pathway?mmu05205/mmu:12389%09red/mmu:15251%09red/mmu:12505%09red
Kaposi sarcoma-associated herpesvirus infection	KEGG PATHWAY	mmu05167	3	217	0.000559957	0.00547222	IL6|CXCL2|HIF1A	http://www.genome.jp/kegg-bin/show_pathway?mmu05167/mmu:20310%09red/mmu:16193%09red/mmu:15251%09red
Pathways in cancer	KEGG PATHWAY	mmu05200	4	535	0.000620425	0.00547222	IL6|EPAS1|HMOX1|HIF1A	http://www.genome.jp/kegg-bin/show_pathway?mmu05200/mmu:16193%09red/mmu:15251%09red/mmu:13819%09red/mmu:15368%09red
Epstein-Barr virus infection	KEGG PATHWAY	mmu05169	3	230	0.000661477	0.00547222	IL6|CD44|TNFAIP3	http://www.genome.jp/kegg-bin/show_pathway?mmu05169/mmu:16193%09red/mmu:21929%09red/mmu:12505%09red
Legionellosis	KEGG PATHWAY	mmu05134	2	58	0.000898646	0.00681473	IL6|CXCL2	http://www.genome.jp/kegg-bin/show_pathway?mmu05134/mmu:20310%09red/mmu:16193%09red
Glutathione metabolism	KEGG PATHWAY	mmu00480	2	64	0.00108607	0.00740474	G6PDX|RRM2	http://www.genome.jp/kegg-bin/show_pathway?mmu00480/mmu:20135%09red/mmu:14381%09red
Leishmaniasis	KEGG PATHWAY	mmu05140	2	67	0.00118623	0.00740474	CYBB|NCF2	http://www.genome.jp/kegg-bin/show_pathway?mmu05140/mmu:17970%09red/mmu:13058%09red
Renal cell carcinoma	KEGG PATHWAY	mmu05211	2	68	0.00122056	0.00740474	EPAS1|HIF1A	http://www.genome.jp/kegg-bin/show_pathway?mmu05211/mmu:15251%09red/mmu:13819%09red
Salmonella infection	KEGG PATHWAY	mmu05132	2	78	0.00158986	0.00904231	IL6|CXCL2	http://www.genome.jp/kegg-bin/show_pathway?mmu05132/mmu:20310%09red/mmu:16193%09red
Hematopoietic cell lineage	KEGG PATHWAY	mmu04640	2	95	0.00232452	0.012358	IL6|CD44	http://www.genome.jp/kegg-bin/show_pathway?mmu04640/mmu:16193%09red/mmu:12505%09red
AGE-RAGE signaling pathway in diabetic complications	KEGG PATHWAY	mmu04933	2	101	0.00261545	0.012358	CYBB|IL6	http://www.genome.jp/kegg-bin/show_pathway?mmu04933/mmu:16193%09red/mmu:13058%09red
Th17 cell differentiation	KEGG PATHWAY	mmu04659	2	102	0.00266552	0.012358	IL6|HIF1A	http://www.genome.jp/kegg-bin/show_pathway?mmu04659/mmu:16193%09red/mmu:15251%09red
Viral protein interaction with cytokine and cytokine receptor	KEGG PATHWAY	mmu04061	2	103	0.00271605	0.012358	IL6|CXCL2	http://www.genome.jp/kegg-bin/show_pathway?mmu04061/mmu:20310%09red/mmu:16193%09red
NF-kappa B signaling pathway	KEGG PATHWAY	mmu04064	2	109	0.00302865	0.0131241	CXCL2|TNFAIP3	http://www.genome.jp/kegg-bin/show_pathway?mmu04064/mmu:20310%09red/mmu:21929%09red
Leukocyte transendothelial migration	KEGG PATHWAY	mmu04670	2	115	0.00335734	0.0138872	CYBB|NCF2	http://www.genome.jp/kegg-bin/show_pathway?mmu04670/mmu:17970%09red/mmu:13058%09red
Carbon metabolism	KEGG PATHWAY	mmu01200	2	121	0.00370199	0.014647	PSAT1|G6PDX	http://www.genome.jp/kegg-bin/show_pathway?mmu01200/mmu:107272%09red/mmu:14381%09red
Metabolic pathways	KEGG PATHWAY	mmu01100	5	1494	0.0043317	0.0164244	PSAT1|PRDX6|G6PDX|HMOX1|RRM2	http://www.genome.jp/kegg-bin/show_pathway?mmu01100/mmu:11758%09red/mmu:20135%09red/mmu:14381%09red/mmu:107272%09red/mmu:15368%09red
Measles	KEGG PATHWAY	mmu05162	2	144	0.00516852	0.0188134	IL6|TNFAIP3	http://www.genome.jp/kegg-bin/show_pathway?mmu05162/mmu:16193%09red/mmu:21929%09red
Vitamin B6 metabolism	KEGG PATHWAY	mmu00750	1	9	0.00732895	0.0256513	PSAT1	http://www.genome.jp/kegg-bin/show_pathway?mmu00750/mmu:107272%09red
Necroptosis	KEGG PATHWAY	mmu04217	2	177	0.00766361	0.0258292	CYBB|TNFAIP3	http://www.genome.jp/kegg-bin/show_pathway?mmu04217/mmu:13058%09red/mmu:21929%09red
Phagosome	KEGG PATHWAY	mmu04145	2	181	0.00799645	0.0259885	CYBB|NCF2	http://www.genome.jp/kegg-bin/show_pathway?mmu04145/mmu:17970%09red/mmu:13058%09red
MicroRNAs in cancer	KEGG PATHWAY	mmu05206	2	282	0.0184368	0.0578536	CD44|HMOX1	http://www.genome.jp/kegg-bin/show_pathway?mmu05206/mmu:15368%09red/mmu:12505%09red
Cytokine-cytokine receptor interaction	KEGG PATHWAY	mmu04060	2	296	0.0201752	0.061198	IL6|CXCL2	http://www.genome.jp/kegg-bin/show_pathway?mmu04060/mmu:20310%09red/mmu:16193%09red
Circadian rhythm	KEGG PATHWAY	mmu04710	1	30	0.0225515	0.0641309	ARNTL	http://www.genome.jp/kegg-bin/show_pathway?mmu04710/mmu:11865%09red
Antifolate resistance	KEGG PATHWAY	mmu01523	1	30	0.0225515	0.0641309	IL6	http://www.genome.jp/kegg-bin/show_pathway?mmu01523/mmu:16193%09red
Pentose phosphate pathway	KEGG PATHWAY	mmu00030	1	32	0.0239895	0.0661528	G6PDX	http://www.genome.jp/kegg-bin/show_pathway?mmu00030/mmu:14381%09red
Prion diseases	KEGG PATHWAY	mmu05020	1	34	0.0254254	0.0680504	IL6	http://www.genome.jp/kegg-bin/show_pathway?mmu05020/mmu:16193%09red
African trypanosomiasis	KEGG PATHWAY	mmu05143	1	39	0.0290063	0.074854	IL6	http://www.genome.jp/kegg-bin/show_pathway?mmu05143/mmu:16193%09red
Glycine, serine and threonine metabolism	KEGG PATHWAY	mmu00260	1	40	0.029721	0.074854	PSAT1	http://www.genome.jp/kegg-bin/show_pathway?mmu00260/mmu:107272%09red
Porphyrin and chlorophyll metabolism	KEGG PATHWAY	mmu00860	1	41	0.0304352	0.074854	HMOX1	http://www.genome.jp/kegg-bin/show_pathway?mmu00860/mmu:15368%09red
Intestinal immune network for IgA production	KEGG PATHWAY	mmu04672	1	43	0.0318619	0.076301	IL6	http://www.genome.jp/kegg-bin/show_pathway?mmu04672/mmu:16193%09red
Mineral absorption	KEGG PATHWAY	mmu04978	1	47	0.0347094	0.0809887	HMOX1	http://www.genome.jp/kegg-bin/show_pathway?mmu04978/mmu:15368%09red
Cysteine and methionine metabolism	KEGG PATHWAY	mmu00270	1	52	0.0382575	0.0870357	PSAT1	http://www.genome.jp/kegg-bin/show_pathway?mmu00270/mmu:107272%09red
Malaria	KEGG PATHWAY	mmu05144	1	55	0.0403802	0.0896244	IL6	http://www.genome.jp/kegg-bin/show_pathway?mmu05144/mmu:16193%09red
Pyrimidine metabolism	KEGG PATHWAY	mmu00240	1	58	0.0424985	0.0914308	RRM2	http://www.genome.jp/kegg-bin/show_pathway?mmu00240/mmu:20135%09red
Inflammatory bowel disease (IBD)	KEGG PATHWAY	mmu05321	1	59	0.0432036	0.0914308	IL6	http://www.genome.jp/kegg-bin/show_pathway?mmu05321/mmu:16193%09red
Mitophagy - animal	KEGG PATHWAY	mmu04137	1	63	0.0460189	0.0938162	HIF1A	http://www.genome.jp/kegg-bin/show_pathway?mmu04137/mmu:15251%09red
Cytosolic DNA-sensing pathway	KEGG PATHWAY	mmu04623	1	64	0.0467215	0.0938162	IL6	http://www.genome.jp/kegg-bin/show_pathway?mmu04623/mmu:16193%09red
Graft-versus-host disease	KEGG PATHWAY	mmu05332	1	65	0.0474236	0.0938162	IL6	http://www.genome.jp/kegg-bin/show_pathway?mmu05332/mmu:16193%09red
p53 signaling pathway	KEGG PATHWAY	mmu04115	1	71	0.0516256	0.099956	RRM2	http://www.genome.jp/kegg-bin/show_pathway?mmu04115/mmu:20135%09red
Bacterial invasion of epithelial cells	KEGG PATHWAY	mmu05100	1	74	0.0537199	0.101844	CAV1	http://www.genome.jp/kegg-bin/show_pathway?mmu05100/mmu:12389%09red
Pertussis	KEGG PATHWAY	mmu05133	1	76	0.0551136	0.102354	IL6	http://www.genome.jp/kegg-bin/show_pathway?mmu05133/mmu:16193%09red
Biosynthesis of amino acids	KEGG PATHWAY	mmu01230	1	78	0.0565054	0.102773	PSAT1	http://www.genome.jp/kegg-bin/show_pathway?mmu01230/mmu:107272%09red
EGFR tyrosine kinase inhibitor resistance	KEGG PATHWAY	mmu01521	1	80	0.0578952	0.102773	IL6	http://www.genome.jp/kegg-bin/show_pathway?mmu01521/mmu:16193%09red
Rheumatoid arthritis	KEGG PATHWAY	mmu05323	1	84	0.0606688	0.102773	IL6	http://www.genome.jp/kegg-bin/show_pathway?mmu05323/mmu:16193%09red
ECM-receptor interaction	KEGG PATHWAY	mmu04512	1	86	0.0620527	0.102773	CD44	http://www.genome.jp/kegg-bin/show_pathway?mmu04512/mmu:12505%09red
Drug metabolism - other enzymes	KEGG PATHWAY	mmu00983	1	87	0.0627438	0.102773	RRM2	http://www.genome.jp/kegg-bin/show_pathway?mmu00983/mmu:20135%09red
PD-L1 expression and PD-1 checkpoint pathway in cancer	KEGG PATHWAY	mmu05235	1	88	0.0634345	0.102773	HIF1A	http://www.genome.jp/kegg-bin/show_pathway?mmu05235/mmu:15251%09red
Viral myocarditis	KEGG PATHWAY	mmu05416	1	89	0.0641248	0.102773	CAV1	http://www.genome.jp/kegg-bin/show_pathway?mmu05416/mmu:12389%09red
Progesterone-mediated oocyte maturation	KEGG PATHWAY	mmu04914	1	90	0.0648145	0.102773	AURKA	http://www.genome.jp/kegg-bin/show_pathway?mmu04914/mmu:20878%09red
Hypertrophic cardiomyopathy (HCM)	KEGG PATHWAY	mmu05410	1	91	0.0655037	0.102773	IL6	http://www.genome.jp/kegg-bin/show_pathway?mmu05410/mmu:16193%09red
Toll-like receptor signaling pathway	KEGG PATHWAY	mmu04620	1	99	0.0709999	0.107683	IL6	http://www.genome.jp/kegg-bin/show_pathway?mmu04620/mmu:16193%09red
Choline metabolism in cancer	KEGG PATHWAY	mmu05231	1	99	0.0709999	0.107683	HIF1A	http://www.genome.jp/kegg-bin/show_pathway?mmu05231/mmu:15251%09red
Chagas disease (American trypanosomiasis)	KEGG PATHWAY	mmu05142	1	103	0.0737363	0.108226	IL6	http://www.genome.jp/kegg-bin/show_pathway?mmu05142/mmu:16193%09red
Amoebiasis	KEGG PATHWAY	mmu05146	1	103	0.0737363	0.108226	IL6	http://www.genome.jp/kegg-bin/show_pathway?mmu05146/mmu:16193%09red
Insulin resistance	KEGG PATHWAY	mmu04931	1	110	0.0785064	0.113398	IL6	http://www.genome.jp/kegg-bin/show_pathway?mmu04931/mmu:16193%09red
C-type lectin receptor signaling pathway	KEGG PATHWAY	mmu04625	1	112	0.0798649	0.113558	IL6	http://www.genome.jp/kegg-bin/show_pathway?mmu04625/mmu:16193%09red
Ribosome biogenesis in eukaryotes	KEGG PATHWAY	mmu03008	1	116	0.0825761	0.114911	NGB	http://www.genome.jp/kegg-bin/show_pathway?mmu03008/mmu:69237%09red
Thyroid hormone signaling pathway	KEGG PATHWAY	mmu04919	1	118	0.0839288	0.114911	HIF1A	http://www.genome.jp/kegg-bin/show_pathway?mmu04919/mmu:15251%09red
Oocyte meiosis	KEGG PATHWAY	mmu04114	1	119	0.0846045	0.114911	AURKA	http://www.genome.jp/kegg-bin/show_pathway?mmu04114/mmu:20878%09red
Yersinia infection	KEGG PATHWAY	mmu05135	1	123	0.0873022	0.116831	IL6	http://www.genome.jp/kegg-bin/show_pathway?mmu05135/mmu:16193%09red
Osteoclast differentiation	KEGG PATHWAY	mmu04380	1	128	0.0906636	0.117977	NCF2	http://www.genome.jp/kegg-bin/show_pathway?mmu04380/mmu:17970%09red
Autophagy - animal	KEGG PATHWAY	mmu04140	1	130	0.0920049	0.117977	HIF1A	http://www.genome.jp/kegg-bin/show_pathway?mmu04140/mmu:15251%09red
Serotonergic synapse	KEGG PATHWAY	mmu04726	1	132	0.0933442	0.117977	DUSP1	http://www.genome.jp/kegg-bin/show_pathway?mmu04726/mmu:19252%09red
FoxO signaling pathway	KEGG PATHWAY	mmu04068	1	132	0.0933442	0.117977	IL6	http://www.genome.jp/kegg-bin/show_pathway?mmu04068/mmu:16193%09red
Dopaminergic synapse	KEGG PATHWAY	mmu04728	1	135	0.0953496	0.118075	ARNTL	http://www.genome.jp/kegg-bin/show_pathway?mmu04728/mmu:11865%09red
Purine metabolism	KEGG PATHWAY	mmu00230	1	136	0.0960171	0.118075	RRM2	http://www.genome.jp/kegg-bin/show_pathway?mmu00230/mmu:20135%09red
Non-alcoholic fatty liver disease (NAFLD)	KEGG PATHWAY	mmu04932	1	151	0.105973	0.128581	IL6	http://www.genome.jp/kegg-bin/show_pathway?mmu04932/mmu:16193%09red
mTOR signaling pathway	KEGG PATHWAY	mmu04150	1	155	0.10861	0.130046	SLC7A5	http://www.genome.jp/kegg-bin/show_pathway?mmu04150/mmu:20539%09red
Hepatitis B	KEGG PATHWAY	mmu05161	1	163	0.113862	0.132664	IL6	http://www.genome.jp/kegg-bin/show_pathway?mmu05161/mmu:16193%09red
Influenza A	KEGG PATHWAY	mmu05164	1	164	0.114516	0.132664	IL6	http://www.genome.jp/kegg-bin/show_pathway?mmu05164/mmu:16193%09red
Jak-STAT signaling pathway	KEGG PATHWAY	mmu04630	1	165	0.11517	0.132664	IL6	http://www.genome.jp/kegg-bin/show_pathway?mmu04630/mmu:16193%09red
Hepatocellular carcinoma	KEGG PATHWAY	mmu05225	1	171	0.119083	0.135457	HMOX1	http://www.genome.jp/kegg-bin/show_pathway?mmu05225/mmu:15368%09red
Tuberculosis	KEGG PATHWAY	mmu05152	1	178	0.123628	0.138891	IL6	http://www.genome.jp/kegg-bin/show_pathway?mmu05152/mmu:16193%09red
Transcriptional misregulation in cancer	KEGG PATHWAY	mmu05202	1	183	0.12686	0.140784	IL6	http://www.genome.jp/kegg-bin/show_pathway?mmu05202/mmu:16193%09red
Cellular senescence	KEGG PATHWAY	mmu04218	1	186	0.128794	0.141208	IL6	http://www.genome.jp/kegg-bin/show_pathway?mmu04218/mmu:16193%09red
Focal adhesion	KEGG PATHWAY	mmu04510	1	199	0.137126	0.147489	CAV1	http://www.genome.jp/kegg-bin/show_pathway?mmu04510/mmu:12389%09red
Chemokine signaling pathway	KEGG PATHWAY	mmu04062	1	200	0.137764	0.147489	CXCL2	http://www.genome.jp/kegg-bin/show_pathway?mmu04062/mmu:20310%09red
Human T-cell leukemia virus 1 infection	KEGG PATHWAY	mmu05166	1	246	0.166615	0.176302	IL6	http://www.genome.jp/kegg-bin/show_pathway?mmu05166/mmu:16193%09red
Human cytomegalovirus infection	KEGG PATHWAY	mmu05163	1	256	0.172763	0.180706	IL6	http://www.genome.jp/kegg-bin/show_pathway?mmu05163/mmu:16193%09red
Endocytosis	KEGG PATHWAY	mmu04144	1	270	0.181296	0.187476	CAV1	http://www.genome.jp/kegg-bin/show_pathway?mmu04144/mmu:12389%09red
MAPK signaling pathway	KEGG PATHWAY	mmu04010	1	294	0.195727	0.200125	DUSP1	http://www.genome.jp/kegg-bin/show_pathway?mmu04010/mmu:19252%09red
PI3K-Akt signaling pathway	KEGG PATHWAY	mmu04151	1	358	0.233021	0.23561	IL6	http://www.genome.jp/kegg-bin/show_pathway?mmu04151/mmu:16193%09red
Herpes simplex virus 1 infection	KEGG PATHWAY	mmu05168	1	439	0.277836	0.277836	IL6	http://www.genome.jp/kegg-bin/show_pathway?mmu05168/mmu:16193%09red
KEGG, Kyoto Encyclopedia of Genes and Genomes.
